# Supplementary material
Source: Springer Nature journal article supplement (https://www.springermedizin.de/resource/supplementary/12960_2013_377_MOESM9_ESM.pdf/9569980)
Supplement: MOESM9 [file 9569980]

|                                                          | Allopathic Students | Ayurvedic Students | Nursing Students | Allopathic Doctors | Ayurvedic Doctors | Nurses |
|----------------------------------------------------------|---------------------|--------------------|------------------|--------------------|-------------------|--------|
| <b>ORGANIZATIONAL FACTORS</b>                            |                     |                    |                  |                    |                   |        |
| <b>Financial attributes</b>                              |                     |                    |                  |                    |                   |        |
| Increase in salary                                       |                     |                    |                  |                    |                   |        |
| <b>Facilities at rural centers</b>                       |                     |                    |                  |                    |                   |        |
| Good clinic infrastructure: drugs and equipment          |                     |                    |                  |                    |                   |        |
| Good physical work environment (tables, chairs, toilets) |                     |                    |                  |                    |                   |        |
| Availability of mentoring staff                          |                     |                    |                  |                    |                   |        |
| Availability of support staff                            |                     |                    |                  |                    |                   |        |
| Adequate work load                                       |                     |                    |                  |                    |                   |        |
| <b>Organizational policies and management</b>            |                     |                    |                  |                    |                   |        |
| Regulatory policies (punctuality, absenteeism)           |                     |                    |                  |                    |                   |        |
| Policies on leave (annual leave, emergency leave)        |                     |                    |                  |                    |                   |        |
| Transfer policies (clear and transparent) & promotions   |                     |                    |                  |                    |                   |        |
| Job security                                             |                     |                    |                  |                    |                   |        |
| General management                                       |                     |                    |                  |                    |                   |        |
| <b>Career growth opportunities</b>                       |                     |                    |                  |                    |                   |        |
| Learning opportunities on the job                        |                     |                    |                  |                    |                   |        |
| Training opportunities                                   |                     |                    |                  |                    |                   |        |
| Research opportunities                                   |                     |                    |                  |                    |                   |        |
| Higher education opportunities                           |                     |                    |                  |                    |                   |        |
| <b>CONTEXTUAL FACTORS</b>                                |                     |                    |                  |                    |                   |        |
| Living facilities                                        |                     |                    |                  |                    |                   |        |
| Proximity to family                                      |                     |                    |                  |                    |                   |        |
| Children's education                                     |                     |                    |                  |                    |                   |        |
| Family well being and comfort                            |                     |                    |                  |                    |                   |        |
| Safety                                                   |                     |                    |                  |                    |                   |        |
